# Supplementary material for: Molecular Mechanisms Involved in MAFLD in Cholecystectomized Patients: A Cohort Study
Source: MDPI journal article supplement (doi:10.3390/genes14101935), 2023-10-13
Supplement: s1 [file s1]

**Table S1.** Correlation of RT-qPCR results and biopsy variables.

|                                | RT-qPCR FGFR4 |              | RT-qPCR FXR1 |          |
|--------------------------------|---------------|--------------|--------------|----------|
|                                | <b>r</b>      | <b>p</b>     | <b>r</b>     | <b>p</b> |
| Degree of steatosis            | -0.642 *      | <b>0.033</b> | 0.241        | 0.475    |
| Percentage of steatosis        | -0.542        | 0.132        | 0.376        | 0.319    |
| Baloonoid degeneration         | -0.228        | 0.501        | -0.355       | 0.284    |
| Degree of lobular inflammation | 0.072         | 0.832        | -0.550       | 0.079    |
| Portal inflammation            | -0.231        | 0.495        | -0.115       | 0.736    |
| Interphase inflammation        | -0.671 *      | <b>0.024</b> | 0.149        | 0.662    |
| Activity score                 | -0.445        | 0.170        | -0.308       | 0.357    |
| Degree of fibrosis             | -0.323        | 0.333        | -0.323       | 0.333    |

Table S1 provides the correlation values between RT-qPCR FGFR4 and RT-qPCR FXR1 with the different histological parameters evaluated. Correlation coefficients: Spearman's rho. \* Correlation is significant at the 0.05 level (bilateral).

**Table S2.** Baseline and month follow-up results of laboratory tests.

|                            | Baseline               | 1 Month                | 3 Months               | 6 Months               | <b>p</b>     |
|----------------------------|------------------------|------------------------|------------------------|------------------------|--------------|
| Total bilirubin (mg/dL)    | 0.81 (0.58–1.52)       | 0.76 (0.50–1.3275)     | 0.71 (0.54–0.91)       | 0.77 (0.52–0.99)       | 0.915        |
| Direct bilirubin (mg/dL)   | 0.12 (0.10–0.84)       | 0.17 (0.10–0.31)       | 0.10 (0.10–0.14)       | 0.10 (0.10–0.15)       | 0.292        |
| Indirect bilirubin (mg/dL) | 0.68 (0.47–0.97)       | 0.66 (0.38–1.00)       | 0.61 (0.40–0.77)       | 0.60 (0.40–0.86)       | 0.706        |
| ALT (U/L)                  | 36.00 (18.50–51.75)    | 27.00 (18.50–48.00)    | 22.00 (18.50–29.00)    | 19.00 (16.00–39.00)    | 0.843        |
| AST (U/L)                  | 29 (16.25–34.25)       | 28.00 (19.00–39.00)    | 23.00 (18.50–27.50)    | 22.00 (20.00–28.00)    | 0.763        |
| GGT (U/L)                  | 28.50 (14.00–131.00)   | 35.00 (28.50–57.45)    | 17.00 (12.00–27.50)    | 14.00 (13.00–39.00)    | <b>0.009</b> |
| FA (U/L)                   | 70.00 (50.00–101.75)   | 73.50 (57.00–87.00)    | 62.00 (57.50–83.50)    | 68.00 (62.00–70.00)    | 0.753        |
| Albumin (g/dL)             | 3.92 (3.72–4.21)       | 4.14 (3.82–4.40)       | 3.97 (3.80–4.15)       | 4.01 (3.86–4.20)       | 0.457        |
| Cholesterol (mg/dL)        | 174.10 (146.25–191.00) | 186.70 (156.70–221.80) | 177.35 (161.85–210.42) | 173.00 (145.00–214.00) | 0.172        |
| LDL cholesterol (mg/dL)    | 111.50 (87.25–128.00)  | 116.00 (95.00–147.90)  | 115.00 (92.50–138.50)  | 109.00 (79.00–136.00)  | 0.067        |
| Triglycerides (mg/dL)      | 94.71 (76.88–127.04)   | 129.00 (75.36–232.62)  | 106.67 (90.06–115.83)  | 101.94 (57.43–132.00)  | 0.346        |
| HDL cholesterol (mg/dL)    | 39.10 (36.25–48.65)    | 42.10 (35.50–49.35)    | 45.15 (38.90–56.52)    | 53.70 (38.00–61.70)    | 0.594        |
| Glucose (mg/dL)            | 100.80 (85.82–120.15)  | 95.35 (91.75–97.85)    | 95.20 (90.22–105.05)   | 89.50 (85.90–101.00)   | 0.619        |
| HbA1c (%)                  | 5.50 (5.25–5.75)       | 5.40 (5.15–5.60)       | 5.30 (5.10–5.70)       | 5.30 (5.00–5.60)       | 0.340        |
| Insulin (mU/L)             | 7.60 (4.90–11.60)      | 7.60 (6.10–18.95)      | 9.20 (5.65–12.35)      | 8.20 (3.20–12.00)      | 0.910        |
| HOMA-IR                    | 2.10 (0.70–2.60)       | 2.10 (1.39–3.74)       | 1.41 (0.56–2.44)       | 0.37 (0.38–2.32)       | 0.071        |

Table S2 provides a summary of the variation in biochemical variables during the follow-up periods. Medians, interquartile range. Friedman test, significance level is 0.050.
